# Supplementary material for: Fascinating chiral information transfer to titania/silica from near to racemic compound self-organized from polyethyleneimine and tartaric acid
Source: Royal Society of Chemistry journal article supplement (doi:10.1039/d3dt00652b), 2023-01-01
Supplement: d3dt00652b1.pdf [file d3dt00652b1.pdf]

## Supporting Information

### Fascinating chiral information transfer to titania/silica from near to racemic compound self-organized from polyethyleneimine and tartaric Acid

Kei Oota and Ren-Hua Jin\*

Department of Material and Life Chemistry, Kanagawa University,

3-27-1 Rokkakubashi, Yokohama 221-8686, Japan

E-mail: rhjin@kanagawa-u.ac.jp

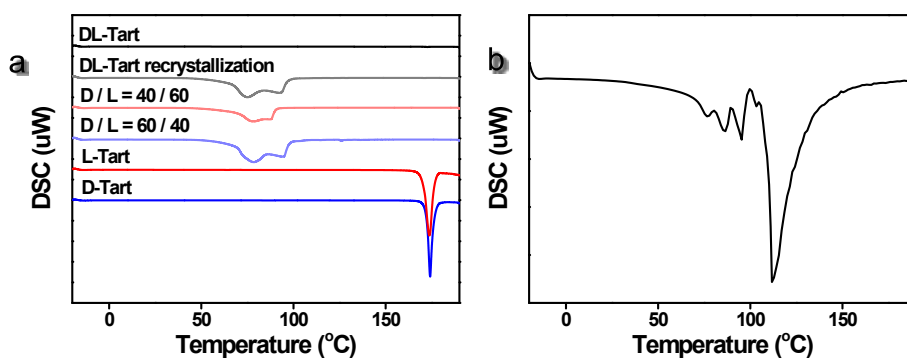

Fig. S1. DSC curves of the crystalline samples. a) Tartaric acid with different ratio of D/L, b) PEI.

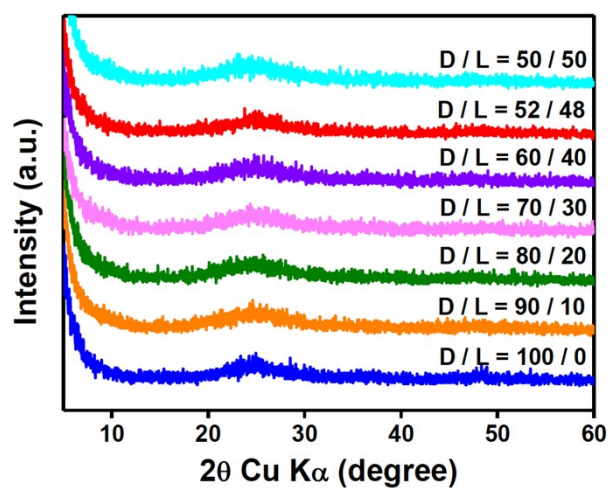

Fig. S2. XRD patterns of the as-prepared  $\text{TiO}_2@\text{P/T}$  from different ratio of D/L.

Table S1.  $\text{TiO}_2$  contents in  $\text{TiO}_2@\text{P/T}$  as-prepared in different enantiomer ratio

| e.e.            | $\text{TiO}_2$ contents (%) |
|-----------------|-----------------------------|
| D               | 57.9                        |
| D / L = 90 / 10 | 50.8                        |
| D / L = 80 / 20 | 52.6                        |
| D / L = 70 / 30 | 48.5                        |
| D / L = 60 / 40 | 51.9                        |
| D / L = 52 / 48 | 52.2                        |
| DL              | 49.3                        |

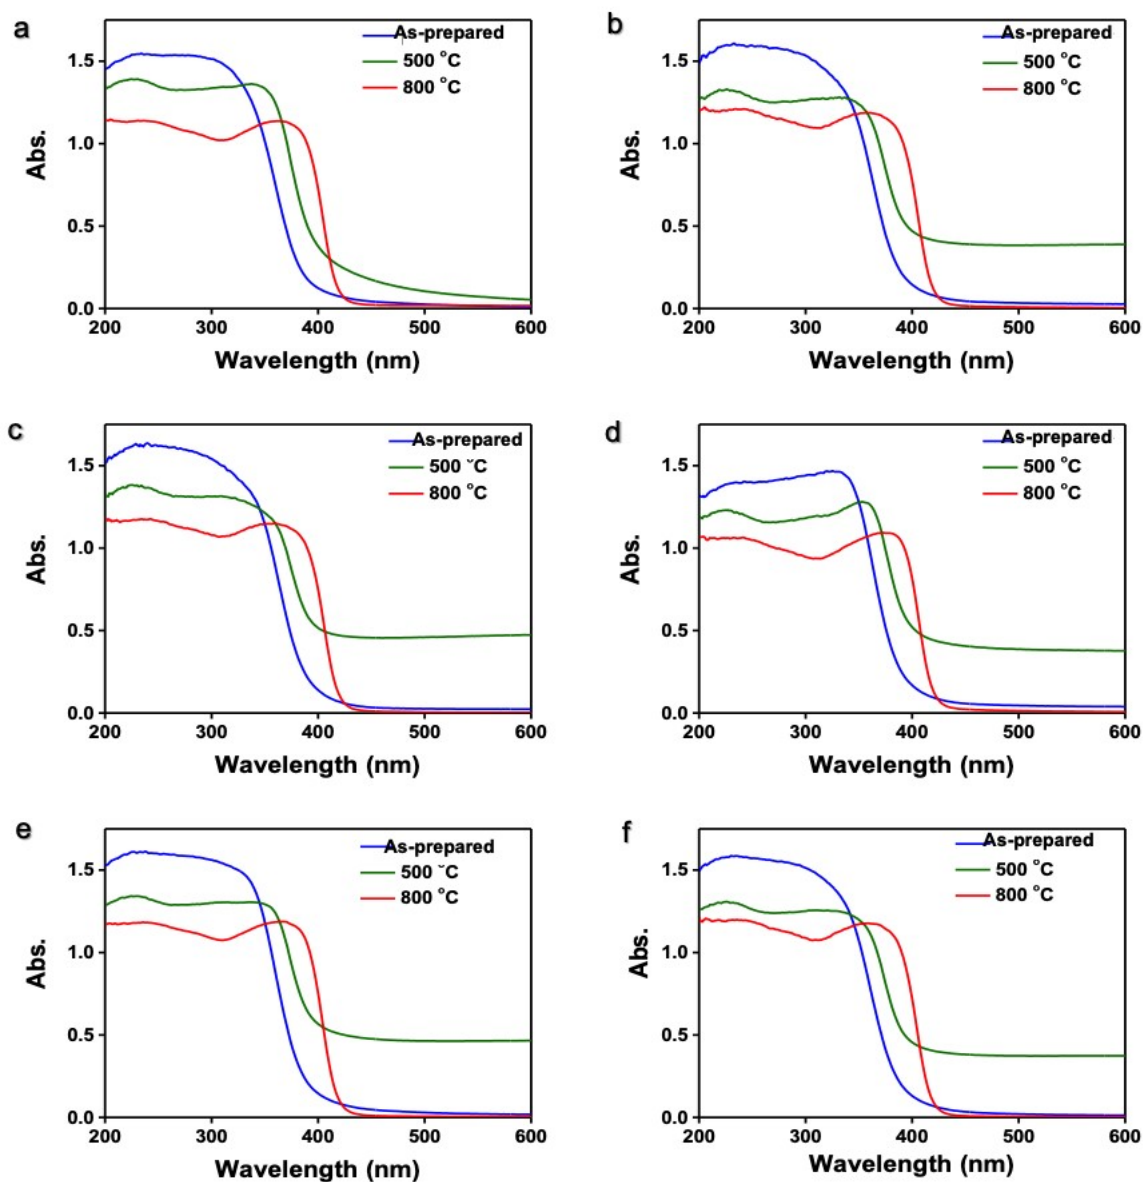

Fig. S3. Diffuse reflection UV-Vis spectra of  $\text{TiO}_2@\text{P}/\text{T}_{\text{D/L}}$  (room temperature),  ${}_A\text{TiO}_2@\text{D}/\text{L}$  (500°C) and  ${}_R\text{TiO}_2@\text{D}/\text{L}$  (800°C): D/L = a) 100/0; b) 90/10; c) 80/20; d) 70/30; e) 60/40; f) 52/48.

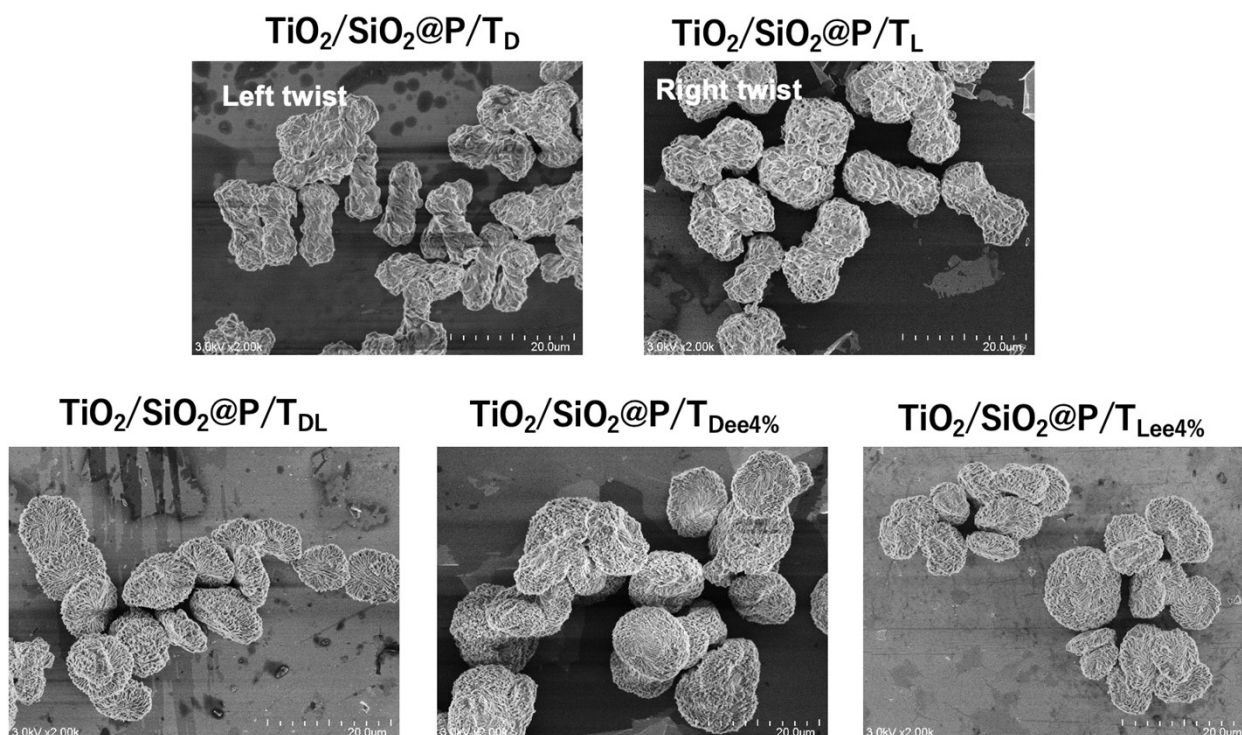

Fig. S4. Low-magnification SEM images of the hybrids as-prepared.

In Fig. S4, we showed low magnification SEM images of the as-prepared hybrids samples of  $\text{TiO}_2/\text{SiO}_2@\text{P}/\text{T}_D$  and  $\text{TiO}_2/\text{SiO}_2@\text{P}/\text{T}_L$ ,  $\text{TiO}_2/\text{SiO}_2@\text{P}/\text{T}_{52/48}$  and  $\text{TiO}_2/\text{SiO}_2@\text{P}/\text{T}_{48/52}$ ,  $\text{TiO}_2/\text{SiO}_2@\text{P}/\text{T}_{50/50}$ . In external morphology, it seems that the rod-like bundles mediated from enantiopure  $\text{P}/\text{T}_D$  and  $\text{P}/\text{T}_L$  twisted roughly in the center of the rods, respectively, by left-handed and right-handed, although there are no regular pitches. In contrast, the hybrids of racemic and  $ee \pm 4\%$  appeared as the same globular morphology, their surface looks like sheet-upright. The sheet-upright in racemic powders appears as radial from the center, but the surface of D- $ee$  4% and L- $ee$  4% seems whirling pattern, respectively, with counter-clockwise for D- $ee$  4% and clockwise for L- $ee$  4%, although these images are not so sharp. At least, these morphological images would be transferred from the crystalline complexes of  $\text{P}/\text{T}$ . Unfortunately, we could not visualize the fibrous bundle and whirling pattern images in the complexes by SEM. There are only large sheet-like aggregates with

wavelet. This would be reason of that the shapes of the P/T complexes were unstable to remain under high vacuum and electronic beam conditions (see Fig. S5).

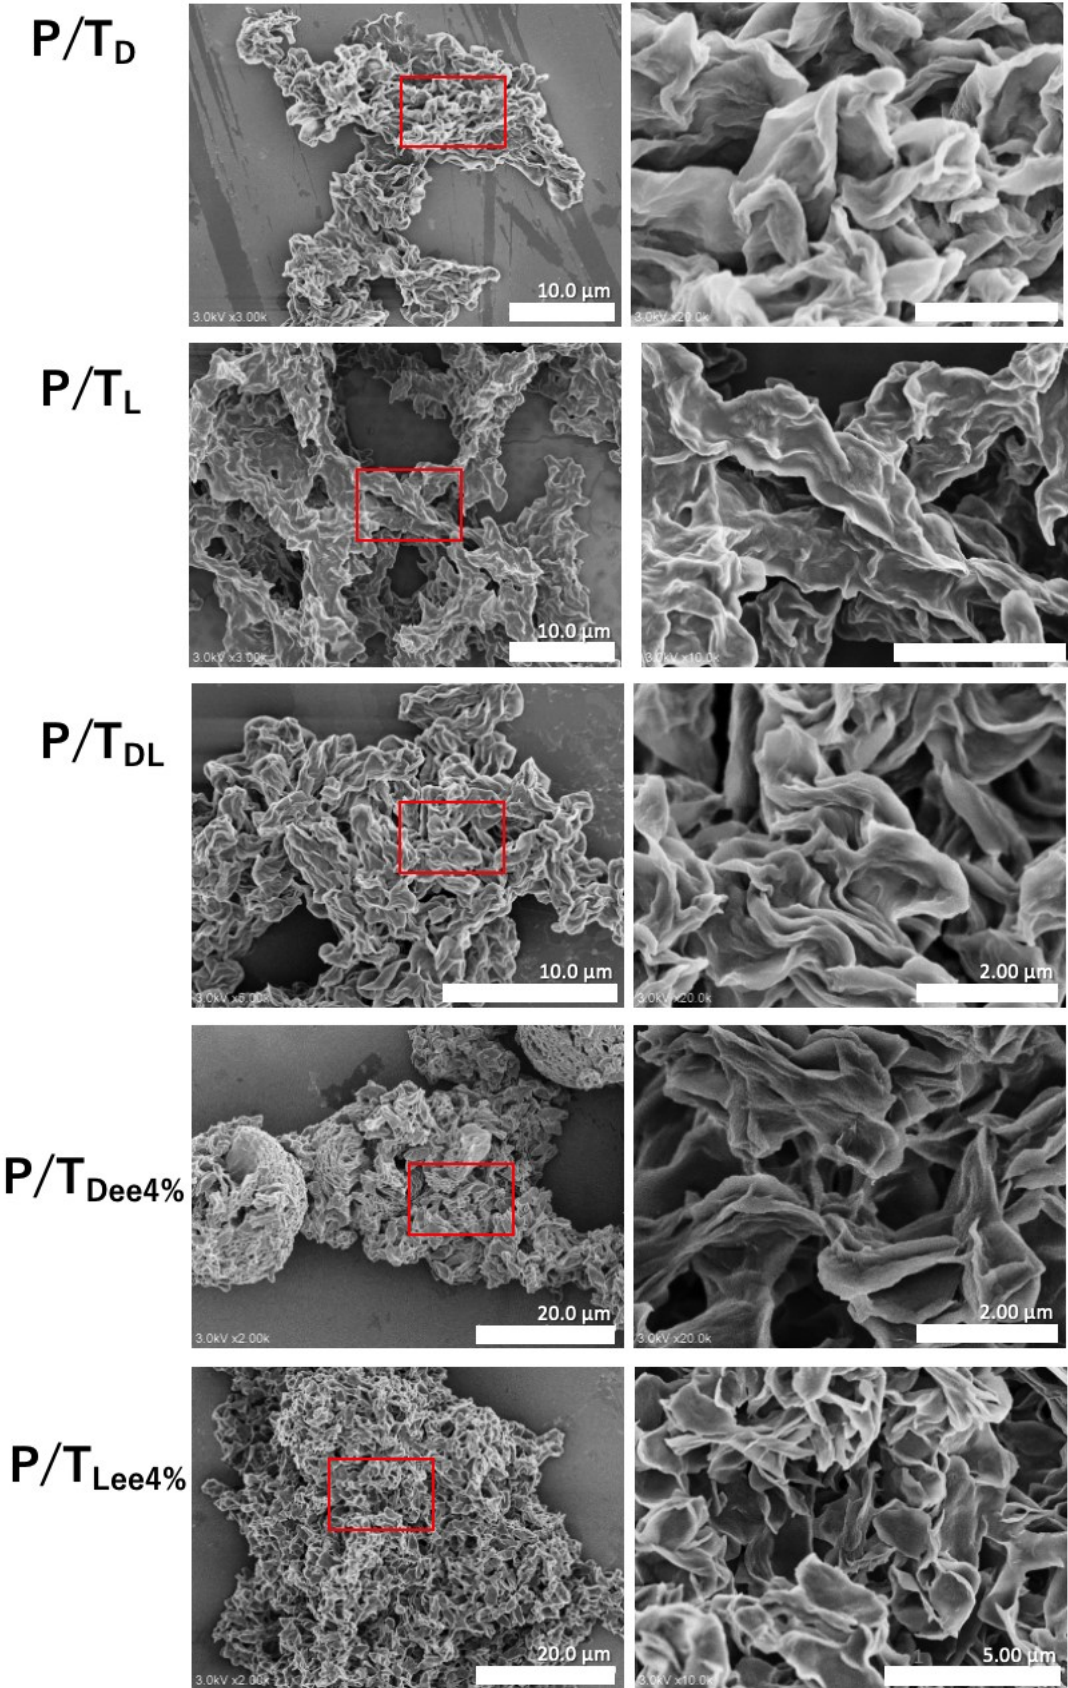

Fig. S5. SEM images P/T crystalline complexes with different enantiomeric component.

Left: low magnification; right: magnified images of the red-line boxed area in the left.

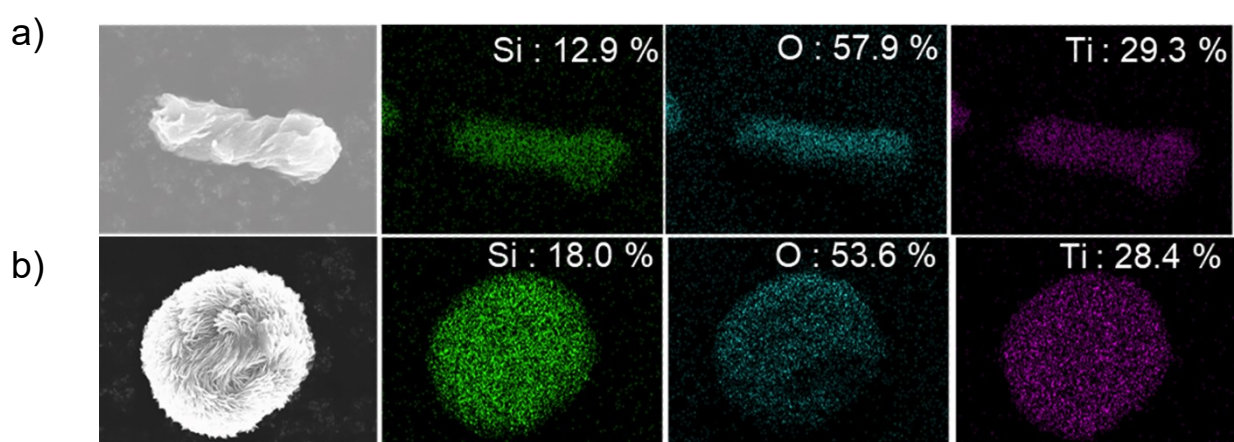

Fig. S6. EDX elemental mappings of calcined samples of  $\text{TiO}_2/\text{SiO}_2@D/L$  (D/L = a) 100/0; b) 52/48.

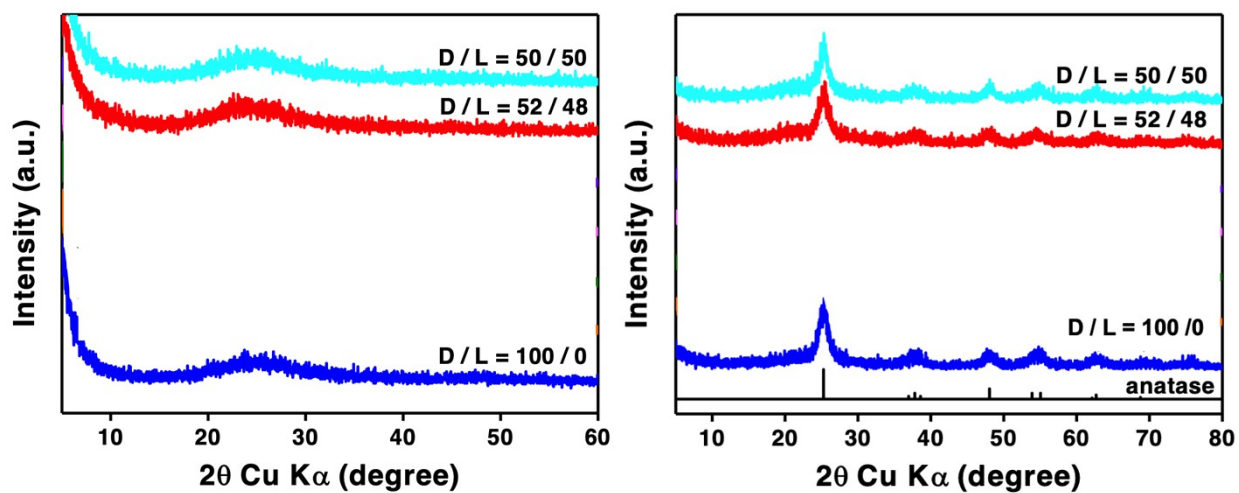

Fig. S7. XRD pattern of hybrid titania/silica. a) and b) as prepared samples of  $\text{TiO}_2/\text{SiO}_2@P/T_{D/L}$ . c) and d)  $800^\circ\text{C}$ -calcined samples of  $\text{TiO}_2/\text{SiO}_2@D/L$ .

Table S2. The crystalline size of  $\text{TiO}_2$  in the hybrids of  $\text{TiO}_2/\text{SiO}_2$  sintered at  $800^\circ\text{C}$

| e.e.            | $800\text{-TiO}_2/\text{SiO}_2 (1,0,1)$<br>crystallite size (nm) |
|-----------------|------------------------------------------------------------------|
| D               | 5.3                                                              |
| D / L = 90 / 10 | 5.1                                                              |
| D / L = 80 / 20 | 4.4                                                              |
| D / L = 70 / 30 | 4.9                                                              |
| D / L = 60 / 40 | 4.8                                                              |
| D / L = 52 / 48 | 4.8                                                              |
| DL              | 5.3                                                              |
